1 **Reproducing Transformation of Indolent B-cell Lymphoma by T-cell**  
2 **Immunosuppression of L.CD40 Mice.**

3

4 Christelle Vincent-Fabert<sup>1</sup>, Alexis Saintamand<sup>2</sup>, Amandine David<sup>1</sup>, Mehdi Alizadeh<sup>3</sup>,  
5 François Boyer<sup>1</sup>, Nicolas Arnaud<sup>1</sup>, Ursula Zimmer-Strobl<sup>4</sup>, Jean Feuillard<sup>1</sup>, Nathalie Faumont<sup>1</sup>

6 <sup>1</sup>CNRS-UMR 7276 CRIBL, University of Limoges, and Hematology Laboratory of  
7 Dupuytren Hospital University Center (CHU) of Limoges; France; <sup>2</sup>INSERM U917,  
8 University of Rennes 1, Rennes, France; <sup>3</sup>LNPRM, EFS Bretagne, Rennes, France and  
9 <sup>4</sup>Research Unit Gene Vectors, Helmholtz Center Munich, German Research Center for  
10 Environmental Health GmbH, Munich, Germany.

11

12 **Corresponding Author:** Nathalie Faumont; CNRS-UMR 7276 INSERM U1262 CRIBL  
13 "Contrôle de la Réponse Immune B et Lymphoproliférations", CBRS "Centre de Biologie et  
14 de Recherche en Santé", Dupuytren Hospital University Center, University of Limoges,  
15 Hematology Laboratory of Dupuytren CHU, 2 rue du Docteur Marcland, 87025 Limoges,  
16 France. Tel: +33 (0)5 19 56 42 21; fax: +33 (0)5 55 43 58 97; and email:  
17 [nathalie.faumont@unilim.fr](mailto:nathalie.faumont@unilim.fr).

18

19 **Keywords:** Indolent B-cell lymphoma, B-cell transformation, Immune surveillance

20 **Word count in abstract: 205**

21 **Word count in text: 2261**

22 **Total number of Figures: 4**

23 **Supplemental Figures: 2**

24 **References Count: 27**

25

26

27

28 **Summary statement**

29 Highlighting the role of immune surveillance, transformation of indolent B-cell lymphoma  
30 into an aggressive malignancy is experimentally reproduced after T-cell immune suppression  
31 in the L.CD40 preclinical mouse model.

32

33 **Abstract**

34 Transformation of an indolent B-cell lymphoma is associated with a more aggressive clinical  
35 course and poor survival. The role of immune surveillance in the transformation of a B-cell  
36 indolent lymphoma towards a more aggressive form is poorly documented. To experimentally  
37 address this question, we used the L.CD40 mouse model, which is characterized by B-cell  
38 specific continuous CD40 signaling, responsible for spleen indolent clonal or oligoclonal B-  
39 cell lymphoma after one year in 60% cases. Immunosuppression was obtained either by T/NK  
40 cell depletion or by treatment with the T-cell immunosuppressive drug cyclosporin A.  
41 Immunosuppressed L.CD40 mice had larger splenomegaly with increased numbers of B-cells  
42 in both spleen and peripheral blood. High-throughput sequencing of immunoglobulin variable  
43 segments revealed that clonal expansion was increased in immunosuppressed L.CD40 mice.  
44 Tumor B cells of immunosuppressed mice were larger with an immunoblastic aspect, both on  
45 blood smears and spleen tissue sections, with increased proliferation rate and increased  
46 numbers of activated B-cells. Collectively, these features suggest that immune suppression  
47 induced a shift from indolent lymphomas into aggressive ones. Thus, as a preclinical model,  
48 immunosuppressed L.CD40 mice reproduce aggressive transformation of an indolent B-cell  
49 tumor and highlight the role of the immune surveillance in its clinical course, opening new  
50 perspective for immune restoration therapies.

51

## 52 **Introduction**

53 Indolent B-cell lymphomas are a group of incurable cancers encompassing various entities  
54 such as chronic lymphocytic leukemia (CLL), follicular lymphoma (FL) or marginal zone  
55 lymphoma (MZL). They occur predominantly in elderly subjects and are extremely rare in  
56 patients younger than 40 years old. Various alterations of the immune system are associated  
57 with aging including a shift from a naive to a memory T-cell phenotype, decreased T-cell  
58 responses to *in vitro* stimulation, and oligoclonal expansion in the T- and B-cell repertoire  
59 (Linterman, 2014; Nikolich-Zugich, 2008; Sarkozy et al., 2015). Aging has been shown to  
60 influence the expression of co-stimulatory molecules such as ICOS and CTLA-4 expression  
61 on T-cells (Canaday et al., 2013) and is also associated with increased frequency of regulatory  
62 T-cells (Treg) in both mice and humans. As Tregs control the intensity of T-cell responses,  
63 they could contribute to age-related immune dysfunction (Raynor et al., 2012). Consequences  
64 of immune decline in elderly people include lower vaccination efficacy, decreased resistance  
65 to infections, increased inflammation and autoimmune activation, decreased immune  
66 surveillance and increased onset of malignancies (Ponnappan and Ponnappan, 2011; Pinti et  
67 al., 2016).

68

69 Despite these immunological deficits in elderly individuals, immune surveillance still  
70 remains, and the indolent tumor B-cells are very likely to subvert their microenvironment  
71 with a prolonged escape phase. For example, FL B-cells may secrete CCL22, which recruits T  
72 regulatory cells (Treg). Furthermore CD4 positive T-cells from FL follicles exhibit a profile  
73 of exhausted effector T-cells with a high proportion of PD1 and/or TIM3 positive cells (Amé-  
74 Thomas and Tarte, 2014). Immune suppression and poor antitumor immune responses are  
75 among hallmarks of CLL (García-Muñoz et al., 2012). CD5, the main surface  
76 immunophenotypic marker of CLL, can lead to IL10 secretion (Gary-Gouy et al., 2002),

77 which acts not only as an autocrine growth factor for leukemic B-cells, but also as an  
78 immunosuppressive cytokine inhibiting T-cells and antigen presenting cells (Ramsay et al.,  
79 2008). Standardized incidence ratios of splenic marginal zone lymphomas is markedly  
80 increased in young adults after solid organ transplantation (Clarke et al., 2013), a clear  
81 indication that immune surveillance may prevent emergence of these lymphomas.  
82 Consistently, the presence of PD-1 positive exhausted T-cells has been reported in marginal  
83 zone lymphomas (Xu-Monette et al., 2017). All indolent lymphomas may evolve towards  
84 aggressive transformation with an increased proliferation index and decreased tumor doubling  
85 time. Such transformation, called Richter's syndrome in CLL, is associated with a more  
86 aggressive clinical course and poor survival. Indeed, progression of indolent B-cell  
87 lymphomas is likely to be associated with escape from immune surveillance (Nicholas et al.,  
88 2016). It is of note, therapies targeting the PD-1/PD-L1 axis seem to be effective only on CLL  
89 with Richter's transformation (Ding et al., 2017). However, in fact, the role of the immune  
90 system is poorly known in such transformation process.

91

92 Our aim was to experimentally address the question of the role the immune suppression in  
93 transformation of an indolent B-cell lymphoma. Among the very few mouse models of  
94 indolent lymphoma is the one published by Hömig-Hölzel *et al* (Hömig-Hölzel et al., 2008).  
95 In this model, the transgene, preceded by a loxP flanked stop-cassette in the *rosa26* genomic  
96 locus, encodes for a chimeric protein composed of the transmembrane domain of latent  
97 membrane protein 1 (LMP1) of EBV and the intracellular signaling domain of CD40, *i.e.*  
98 L.CD40 mice. This chimeric protein is responsible for a continuous CD40 signal, which  
99 results in continuous NF- $\kappa$ B activation (Gires et al., 1997). When crossed with mice  
100 expressing Cre recombinase under control of the CD19 promoter (CD19-Cre mice), L.CD40  
101 mice first exhibit an expansion of the marginal B-cell compartment in the spleen and then  
102 develop an indolent lymphoma of the spleen after one year in 60% of cases (Hömig-Hölzel et

103 al., 2008). Construction of the L.CD40 model is closed from the one of Zhang *et al* in which  
104 the transgene was the latent membrane protein 1, the main oncogenic protein of Epstein Barr  
105 Virus (EBV), which acts by rerouting CD40 signaling pathways (Zhang et al., 2012). In this  
106 model, LMP1 expressing B-cells were almost completely eliminated by the host immune  
107 system, and only deep T and NK cell depletion allows rapid emergence of highly aggressive  
108 B-cell lymphomas.

109

110 Here, we found that immune suppression either by T-cell depletion or by treatment with the  
111 T-cell immunosuppressive drug of L.CD40 mice induced a shift from an indolent to an  
112 aggressive lymphoproliferative disorder. These results suggest that, according to the immune  
113 status, the L.CD40 mouse model could be a preclinical model not only of indolent B-cell  
114 lymphoma but also of their transformed counterpart and point on the role of immune anti-  
115 tumor surveillance in the natural course of these cancers.

116

117 **Results**

118 *Increased splenomegaly is due to spleen expansion of B-cells in immunosuppressed L.CD40*  
119 *mice.*

120 Raising the question of the role of immune surveillance in indolent B-cell lymphomagenesis,  
121 we tested the effect of immunosuppression on indolent lymphoma developed by L.CD40  
122 mice. Eight months old L.CD40 mice were treated either every 4 days with a cocktail of  
123 monoclonal antibodies (mAbs) against T and NK-cells for 3 weeks or daily with CsA for 3  
124 weeks or 3 months. T-cell depletion and CsA treatment had no effect on the size and weight  
125 of spleens from CD19-Cre mice (not shown). After three weeks treatment with mAbs against  
126 T and NK cells, T-cell depletion was very pronounced in spleen and almost complete in blood  
127 (Figure S1A and S1B). After CsA treatment, T-cells strongly decreased in the blood and only  
128 mildly in the spleen (Figure S1C). T and NK cell depletion by mAbs was associated with  
129 increased spleen enlargement (Figure 1A). This spleen enlargement was related to increase in  
130 splenocyte absolute numbers (Figure 1B), that was mainly due to B-cell compartment  
131 expansion (Figure 1C). Three weeks immunosuppression with CsA had no significant effect  
132 on spleen size (not shown). After 3 months, spleens of control L.CD40 mice were further  
133 enlarged due to aging (Figure 1A). However, three months immunosuppression with CsA  
134 induced a more pronounced splenomegaly (Figure 1A), with a significant increase in absolute  
135 number of spleen cells (Figure 1B), that was also due to increased spleen B-cell content  
136 (Figure 1C).

137

138 *Increased spleen expansion of B-cells in immunosuppressed L.CD40 mice is related to*  
139 *increased B-cell clonal abundance with presence of activated large cells and increased*  
140 *proliferation index.*

141 Analysis of B-cell clonality was done by high-throughput sequencing of VDJ regions (Figure  
142 2). With a threshold of 10% clonal frequency (or clonal abundance), no significant clonal  
143 expansion was seen in one year old control wild type mice. Even if spleen morphology  
144 remained globally unchanged, without splenomegaly and without B-cell expansion, three-  
145 month CsA treatment of control mice was associated with presence of spleen B-cell clones  
146 above 10% in one out of the three tested cases (33%) cases. Three out of the five (60%)  
147 untreated L.CD40 mice exhibited clonal B-cell expansion. Five out of five (100%) three  
148 month CsA immunosuppressed L.CD40 mice were clonal. Mean clonal abundance of the  
149 dominant clone was 42% and 12% in L.CD40 mice with or without immune suppression  
150 respectively (Student T-test,  $p = 0.03$ ), without any bias in terms of V segment usage (not  
151 shown). These results indicate that long term CsA induced immunosuppression did  
152 significantly favor expansion of clonal B-cells in L.CD40 mice. Morphologically, spleen B-  
153 cell increase in three-month CsA immunosuppressed mice was associated with broad sheets  
154 of large cells with oval nuclei, lacy chromatin and paracentral nucleoli (Figure S2A). This cell  
155 size enlargement was confirmed by flow cytometry since forward scatter of B-cells was  
156 increased in immunosuppressed mice (Figure S2B). Expression of activation markers such as  
157 CD80 and CD86 was up-regulated in IS L.CD40 mice (Figure 3A). The fraction of BrdU  
158 positive B-cells from immunosuppressed L.CD40 mice was increased when compared to  
159 controls (Figure 3B) as well as numbers of Ki67 positive cells in spleens (Figure S2C).  
160 Altogether, these results suggest that long-term immune suppression was associated with both  
161 increased clonal expansion and aggressive transformation of the indolent L.CD40 B-cell  
162 lymphoma.

163

164 *Increased amounts of large B-cells in the blood of long term immunosuppressed L.CD40 mice*



165 No significant changes were seen in blood from three weeks T and NK cell depleted mice (not  
166 shown). After two months, CsA treatment we observed increased leukocytes in L.CD40 mice  
167 (Figure 4A). As assessed by flow cytometry, the B-cell compartment of CsA treated L.CD40  
168 mice was increased, contrasting with the decrease in granulocytes and T-cells (Figure 4B).  
169 We also noticed the emergence of large B-cells on the forward scatter (FCS) monoparametric  
170 histograms (Figure 4C left panel). This cell size increase was confirmed on blood smears after  
171 May-Grunwald Giemsa (MGG) staining (Figure 4D right panel). Lymphocytes from control  
172 L.CD40 mice remained small with little cytoplasm, round nuclei and dense chromatin while  
173 those from CsA treated L.CD40 mice were often large with abundant basophilic cytoplasm,  
174 and prominent nucleoli.

175

176 **Discussion**

177 Here, we experimentally raise the question of role of the immune suppression in the  
178 transformation of an indolent B-cell lymphoma using the L.CD40 mouse model. It was seen  
179 that immune suppression accelerated clonal B-cell expansion and increased the tumor  
180 aggressiveness.

181

182 Post-transplant lymphoproliferative disorders is one of the main clinical situation in which  
183 therapeutic induced immune suppression (CsA being one of the main immune suppressive  
184 drug) is the direct cause of B-cell lymphoma. These B-cell lymphomas are almost always  
185 aggressive and are very often associated with EBV. Indeed, the vigorous immune surveillance  
186 exerted against EBV-immortalized B-cells in immunocompetent hosts constrains the EBV-  
187 immortalized B-cell to adopt a silenced non-proliferating phenotype to evade the immune  
188 response. Such role of the immune surveillance has been experimentally demonstrated by  
189 Zhang *et al* who show, in a genetically modified mouse model, that the immune system is  
190 able to eliminate B-cells that have been endogenously activated by LMP1, the main  
191 oncoprotein of EBV (Zhang et al., 2012). In both cases of EBV infection or LMP1 mouse  
192 model, the immunocompetent host is able to completely abolish emergence of clonal B-cell  
193 lymphoma, and only immune suppression reveals the transformation potential of EBV and its  
194 oncoprotein LMP1. The L.CD40 model is different since B-cells bearing CD40 continuous  
195 signaling slowly accumulate with late clonal emergence. Moreover, after immune  
196 suppression, emergence kinetics of aggressive B-cell clones is much faster for the LMP1  
197 mouse model than for the L.CD40 model, taking few weeks for the former(Zhang et al., 2012)  
198 and few month for the latter (our results). In that view B-cells bearing CD40 continuous  
199 signaling are very likely to be able to escape from the host immune system and to  
200 progressively accumulate. CD40 and LMP1 signaling pathways are not exactly similar

201 (Graham et al., 2010). For example, CD40 activation of the alternate NF- $\kappa$ B pathway is more  
202 intense than the one of LMP1 that mainly activates the classical pathway (Chanut et al.,  
203 2014).

204

205 A pivotal event in the natural history of almost all indolent B-cell lymphomas is  
206 transformation into a more aggressive malignancy, most frequently resembling DLBCLs. At 5  
207 years, transformation frequency may be below 5%, as for marginal zone lymphomas and over  
208 20% for FCLs and CLL (Montoto and Fitzgibbon, 2011). Among genetic events associated  
209 with transformation are those promoting c-Myc activation or TP53 inactivation (Lossos and  
210 Gascoyne, 2011). With the background of a primary genetic event affecting the common  
211 precursor tumor cells such as translocation of BCL2 in FCLs, del(13q) or del(12q) in CLL  
212 and MALT1 or BCL10 in MALT marginal zone lymphomas, acquisition of genetic events  
213 promoting proliferation and/or resistance to cell death would favor Darwinian selection of  
214 more aggressive subclones. Such a transformation arises either from the dominant clone as in  
215 most cases of CLL (Fabbri et al., 2013; Mao et al., 2007) or from clonally related common  
216 precursor tumor cell as in FCLs (Bouska et al., 2017; Fabbri et al., 2013; Pasqualucci et al.,  
217 2014). Transformation of FL is associated with genetic events favoring immune escape  
218 (Bouska et al., 2017; Fabbri et al., 2013; Pasqualucci et al., 2014). In solid cancers such as  
219 melanomas or lung carcinomas, there is a clear relationship between the mutation burden and  
220 a positive response to immunotherapies directed against the PD-L1/PD-1 axis, most likely due  
221 to the high number of tumor specific neo-antigens (Simone et al., 2015). Acquisition of  
222 additional genetic events in indolent lymphomas would be associated with increased  
223 immunogenicity of the subclonal B-cells. As noted above, anti PD-1 immune therapies are  
224 effective only in CLL with Richter's transformation. In this context, it can be put-forward that  
225 transformation of an indolent B-cell lymphoma could be due either to aggravation of patient

226 immune deficiency or to genetic acquisition of a series of tools able to neutralize the anti-  
227 tumor immune response by the transformed B-cell while increasing its proliferation index.

228

229 L.CD40 indolent B-cell lymphomas are characterized by increase in splenomegaly and  
230 considerable expansion of splenic B-cells with late acquisition of oligo or monoclonality. The  
231 proliferative index remains consistently low or moderate, with no evidence for transformation  
232 into high-grade lymphoma. Immunosuppression of L.CD40 mice led to increased  
233 aggressiveness of the lymphoproliferative B-cell disorder. Signs of aggressiveness included  
234 increased splenomegaly, size and proliferative index of cells, expression of activation markers  
235 and blood passage of B-cells. This transformation was associated with increased expansion of  
236 B-cell clones. It seems likely that immune suppression was be associated with a  
237 morphological, immunophenotypic and proliferative shift toward tumor aggressiveness from  
238 preexisting clones. This suggests that induced immunosuppression removed a control exerted  
239 by the immune system on B-cell expansion in L.CD40 mice and reproduce the main features  
240 of indolent B-cell lymphoma transformation. Thus, in the view of therapies allowing immune  
241 restoration, the L.CD40 mouse model opens interesting perspectives not only as preclinical  
242 model of indolent B-cell lymphoma but also as a model of aggressive transformation of a B-  
243 cell indolent clone.

244

## 245 **Material and Methods**

### 246 *Mouse models and treatments*

247 L.CD40 mice have been already described (Hömig-Hölzel et al., 2008). Animals were housed  
248 at 21–23°C with a 12-h light/dark cycle. All procedures were conducted under an approved  
249 protocol according to European guidelines for animal experimentation (French national  
250 authorization number: 87- 022 and French ethics committee registration number “CREEAL”:  
251 09-07-2012). For antibody-mediated T-cell depletion, L.CD40 mice were injected  
252 intraperitoneally every 4 days for three weeks with a mix of anti-CD4 (YTS 191.1.2), anti-  
253 CD8 (YTS 169.4.2.1), and anti-Thy-1 (YTS 154.7.7.10) antibodies (200 µg each) in In  
254 VivoPure Dilution Buffer, (Bio X cell; US). For CsA treatment, wild type and L.CD40 mice  
255 were injected intraperitoneally daily for three months with placebo (diluent composed of  
256 ethanol and cremophor) or 10 mg/kg CsA (Sandimmun – Novartis; US) diluted in 5%  
257 glucose.

258

### 259 *Flow cytometry*

260 Blood from mice (200 µL) was collected intra-orbitally. Spleen and lymph nodes were also  
261 collected and immune cells were filtered through a sterile nylon membrane. Cell suspensions  
262 were stained at 4°C in FACS Buffer (PBS, 1% FBS, 2 mM EDTA). The following  
263 fluorescent-labelled antibodies were used: anti B220-BV421 (clone RA3-6B2, 1/400), anti  
264 CD80-APC (clone16-10A1, 1/2500), anti CD86-FITC (clone GL-1, 1/600), anti CD3-PE  
265 (clone 17A2, 1/100) from BioLegend (San Diego, CA, USA). Stained cells were analyzed  
266 using a BD-Fortessa SORP flow cytometer (BD Bioscience; US). Results were analyzed  
267 using Kaluza Flow Cytometry software 1.2 (Beckman Coulter; France).

268

269 *Proliferation*

270 For in vivo proliferation, mice were injected intraperitoneally with 2 mg BrdU (Sigma-  
271 Aldrich, US), 18 hours before isolating cells. Splenocytes were stained for B220 and phases  
272 of cell cycle were analyzed by measuring BrdU and Propidium Iodide (PI)-incorporation,  
273 using the FITC-BrdU Flow Kit (BD Pharmingen; US).

274

275 *Sequencing of VDJ regions*

276 RNA was extracted from total spleen, and one  $\mu\text{g}$  was used for sequencing. Immunoglobulin  
277 gene transcripts were amplified by 5'RACE PCR as described (Boice et al., 2016). Illumina  
278 sequencing adapter sequences were added by primer extension, and resulting amplicons were  
279 sequenced on an Illumina MiSeq sequencing system using MiSeq kit Reagent V3 600 cycles.  
280 Repertoire analysis was done using IMGT/HighV-QUEST tool and R software. Briefly, VH,  
281 JH and CDR3 segments were identified using HighV-QUEST. Based on these annotations,  
282 reads were grouped in clonotypes that share the same VH and JH gene and high CDR3  
283 homology. The relative abundance of each clonotype was then calculated.

284

285 **Acknowledgments:** We thank Dr J Cook Moreau, UMR CNRS 7276, Limoges, France, for  
286 English editing. The group of J Feuillard is supported by grants from the Ligue Nationale  
287 contre le Cancer (Equipe Labellisée Ligue), the Institut National contre le Cancer (INCa), the  
288 Comité Orientation Recherche Cancer (CORC), the Limousin Region and the Haute Vienne  
289 and Corrèze committees of the Ligue Nationale contre le Cancer and by the Lyons Club of  
290 Corrèze. U Zimmer-Strobl was supported by the German Research Foundation (SFB 1243,  
291 TP-A13 and ZI1382/4-1).

292

### 293 **Authorship Contributions**

294 C.V.F. performed and analyzed experiments, and contributed to the writing. N.A. and A.D.  
295 helped to perform proliferation and flow cytometry experiments. A.S., M.A, and F.B.  
296 analysed the B-cell repertoire. U.Z.S. helped analyze the results and contributed to the writing  
297 of the manuscript. J.F. and N.F. designed and directed the study, contributed to the  
298 experiments, analyzed the results and wrote the manuscript.

299

300

### 301 **Conflict of Interest Disclosures**

302 Authors declare no conflict of interest.

303

304 **References**

- 305 Amé-Thomas, P., Tarte, K., 2014. The yin and the yang of follicular lymphoma cell niches:  
306 role of microenvironment heterogeneity and plasticity. *Semin. Cancer Biol.* 24, 23–32.  
307 <https://doi.org/10.1016/j.semcancer.2013.08.001>
- 308 Bouska, A., Zhang, W., Gong, Q., Iqbal, J., Scuto, A., Vose, J., Ludvigsen, M., Fu, K.,  
309 Weisenburger, D.D., Greiner, T.C., Gascoyne, R.D., Rosenwald, A., Ott, G., Campo,  
310 E., Rimsza, L.M., Delabie, J., Jaffe, E.S., Braziel, R.M., Connors, J.M., Wu, C.-I.,  
311 Staudt, L.M., D'Amore, F., McKeithan, T.W., Chan, W.C., 2017. Combined copy  
312 number and mutation analysis identifies oncogenic pathways associated with  
313 transformation of follicular lymphoma. *Leukemia* 31, 83–91.  
314 <https://doi.org/10.1038/leu.2016.175>
- 315 Canaday, D.H., Parker, K.E., Aung, H., Chen, H.E., Nunez-Medina, D., Burant, C.J., 2013.  
316 Age-dependent changes in the expression of regulatory cell surface ligands in  
317 activated human T-cells. *BMC Immunol.* 14, 45. [https://doi.org/10.1186/1471-2172-](https://doi.org/10.1186/1471-2172-14-45)  
318 14-45
- 319 Chanut, A., Duguet, F., Marfak, A., David, A., Petit, B., Parrens, M., Durand-Panteix, S.,  
320 Boulin-Deveza, M., Gachard, N., Youlyouz-Marfak, I., Bordessoule, D., Feuillard, J.,  
321 Faumont, N., 2014. RelA and RelB cross-talk and function in Epstein-Barr virus  
322 transformed B cells. *Leukemia* 28, 871–879. <https://doi.org/10.1038/leu.2013.274>
- 323 Clarke, C.A., Morton, L.M., Lynch, C., Pfeiffer, R.M., Hall, E.C., Gibson, T.M.,  
324 Weisenburger, D.D., Martínez-Maza, O., Hussain, S.K., Yang, J., Chang, E.T., Engels,  
325 E.A., 2013. Risk of lymphoma subtypes after solid organ transplantation in the United  
326 States. *Br. J. Cancer* 109, 280–288. <https://doi.org/10.1038/bjc.2013.294>
- 327 Ding, W., LaPlant, B.R., Call, T.G., Parikh, S.A., Leis, J.F., He, R., Shanafelt, T.D., Sinha, S.,  
328 Le-Rademacher, J., Feldman, A.L., Habermann, T.M., Witzig, T.E., Wiseman, G.A.,  
329 Lin, Y., Asmus, E., Nowakowski, G.S., Conte, M.J., Bowen, D.A., Aitken, C.N., Van



- 330 Dyke, D.L., Greipp, P.T., Liu, X., Wu, X., Zhang, H., Secreto, C.R., Tian, S., Braggio,  
331 E., Wellik, L.E., Micallef, I., Viswanatha, D.S., Yan, H., Chanan-Khan, A.A., Kay,  
332 N.E., Dong, H., Ansell, S.M., 2017. Pembrolizumab in patients with CLL and Richter  
333 transformation or with relapsed CLL. *Blood* 129, 3419–3427.  
334 <https://doi.org/10.1182/blood-2017-02-765685>
- 335 Fabbri, G., Khiabani, H., Holmes, A.B., Wang, J., Messina, M., Mullighan, C.G.,  
336 Pasqualucci, L., Rabadan, R., Dalla-Favera, R., 2013. Genetic lesions associated with  
337 chronic lymphocytic leukemia transformation to Richter syndrome. *J. Exp. Med.* 210,  
338 2273–2288. <https://doi.org/10.1084/jem.20131448>
- 339 García-Muñoz, R., Galiacho, V.R., Llorente, L., 2012. Immunological aspects in chronic  
340 lymphocytic leukemia (CLL) development. *Ann. Hematol.* 91, 981–996.  
341 <https://doi.org/10.1007/s00277-012-1460-z>
- 342 Gary-Gouy, H., Harriague, J., Bismuth, G., Platzer, C., Schmitt, C., Dalloul, A.H., 2002.  
343 Human CD5 promotes B-cell survival through stimulation of autocrine IL-10  
344 production. *Blood* 100, 4537–4543. <https://doi.org/10.1182/blood-2002-05-1525>
- 345 Gires, O., Zimmer-Strobl, U., Gonnella, R., Ueffing, M., Marschall, G., Zeidler, R., Pich, D.,  
346 Hammerschmidt, W., 1997. Latent membrane protein 1 of Epstein-Barr virus mimics a  
347 constitutively active receptor molecule. *EMBO J.* 16, 6131–6140.  
348 <https://doi.org/10.1093/emboj/16.20.6131>
- 349 Graham, J.P., Arcipowski, K.M., Bishop, G.A., 2010. Differential B-lymphocyte regulation  
350 by CD40 and its viral mimic, latent membrane protein 1. *Immunol. Rev.* 237, 226–  
351 248. <https://doi.org/10.1111/j.1600-065X.2010.00932.x>
- 352 Hömig-Hölzel, C., Hojer, C., Rastelli, J., Casola, S., Strobl, L.J., Müller, W., Quintanilla-  
353 Martinez, L., Gewies, A., Ruland, J., Rajewsky, K., Zimmer-Strobl, U., 2008.  
354 Constitutive CD40 signaling in B cells selectively activates the noncanonical NF-

- 355 kappaB pathway and promotes lymphomagenesis. *J. Exp. Med.* 205, 1317–1329.  
356 <https://doi.org/10.1084/jem.20080238>
- 357 Linterman, M.A., 2014. How T follicular helper cells and the germinal centre response  
358 change with age. *Immunol. Cell Biol.* 92, 72–79. <https://doi.org/10.1038/icb.2013.77>
- 359 Lossos, I.S., Gascoyne, R.D., 2011. Transformation of follicular lymphoma. *Best Pract. Res.*  
360 *Clin. Haematol.* 24, 147–163. <https://doi.org/10.1016/j.beha.2011.02.006>
- 361 Mao, Z., Quintanilla-Martinez, L., Raffeld, M., Richter, M., Krugmann, J., Burek, C.,  
362 Hartmann, E., Rudiger, T., Jaffe, E.S., Müller-Hermelink, H.K., Ott, G., Fend, F.,  
363 Rosenwald, A., 2007. IgVH mutational status and clonality analysis of Richter's  
364 transformation: diffuse large B-cell lymphoma and Hodgkin lymphoma in association  
365 with B-cell chronic lymphocytic leukemia (B-CLL) represent 2 different pathways of  
366 disease evolution. *Am. J. Surg. Pathol.* 31, 1605–1614.  
367 <https://doi.org/10.1097/PAS.0b013e31804bdaf8>
- 368 Montoto, S., Fitzgibbon, J., 2011. Transformation of indolent B-cell lymphomas. *J. Clin.*  
369 *Oncol. Off. J. Am. Soc. Clin. Oncol.* 29, 1827–1834.  
370 <https://doi.org/10.1200/JCO.2010.32.7577>
- 371 Nicholas, N.S., Apollonio, B., Ramsay, A.G., 2016. Tumor microenvironment (TME)-driven  
372 immune suppression in B cell malignancy. *Biochim. Biophys. Acta* 1863, 471–482.  
373 <https://doi.org/10.1016/j.bbamcr.2015.11.003>
- 374 Nikolich-Zugich, J., 2008. Ageing and life-long maintenance of T-cell subsets in the face of  
375 latent persistent infections. *Nat. Rev. Immunol.* 8, 512–522.  
376 <https://doi.org/10.1038/nri2318>
- 377 Pasqualucci, L., Khiabanian, H., Fangazio, M., Vasishtha, M., Messina, M., Holmes, A.B.,  
378 Ouillette, P., Trifonov, V., Rossi, D., Tabbò, F., Ponzoni, M., Chadburn, A., Murty,  
379 V.V., Bhagat, G., Gaidano, G., Inghirami, G., Malek, S.N., Rabadan, R., Dalla-Favera,

- 380 R., 2014. Genetics of follicular lymphoma transformation. *Cell Rep.* 6, 130–140.  
381 <https://doi.org/10.1016/j.celrep.2013.12.027>
- 382 Pinti, M., Appay, V., Campisi, J., Frasca, D., Fülöp, T., Sauce, D., Larbi, A., Weinberger, B.,  
383 Cossarizza, A., 2016. Aging of the immune system: Focus on inflammation and  
384 vaccination. *Eur. J. Immunol.* 46, 2286–2301. <https://doi.org/10.1002/eji.201546178>
- 385 Ponnappan, S., Ponnappan, U., 2011. Aging and immune function: molecular mechanisms to  
386 interventions. *Antioxid. Redox Signal.* 14, 1551–1585.  
387 <https://doi.org/10.1089/ars.2010.3228>
- 388 Ramsay, A.G., Johnson, A.J., Lee, A.M., Gorgün, G., Le Dieu, R., Blum, W., Byrd, J.C.,  
389 Gribben, J.G., 2008. Chronic lymphocytic leukemia T cells show impaired  
390 immunological synapse formation that can be reversed with an immunomodulating  
391 drug. *J. Clin. Invest.* 118, 2427–2437. <https://doi.org/10.1172/JCI35017>
- 392 Raynor, J., Lages, C.S., Shehata, H., Hildeman, D.A., Choungnet, C.A., 2012. Homeostasis  
393 and function of regulatory T cells in aging. *Curr. Opin. Immunol.* 24, 482–487.  
394 <https://doi.org/10.1016/j.coi.2012.04.005>
- 395 Sarkozy, C., Salles, G., Falandry, C., 2015. The biology of aging and lymphoma: a complex  
396 interplay. *Curr. Oncol. Rep.* 17, 32. <https://doi.org/10.1007/s11912-015-0457-x>
- 397 Simone, C.B., Burri, S.H., Heinzerling, J.H., 2015. Novel radiotherapy approaches for lung  
398 cancer: combining radiation therapy with targeted and immunotherapies. *Transl. Lung  
399 Cancer Res.* 4, 545–552. <https://doi.org/10.3978/j.issn.2218-6751.2015.10.05>
- 400 Xu-Monette, Z.Y., Zhou, J., Young, K.H., 2017. PD-1 expression and clinical PD-1 blockade  
401 in B-cell lymphomas. *Blood.* <https://doi.org/10.1182/blood-2017-07-740993>
- 402 Zhang, B., Kracker, S., Yasuda, T., Casola, S., Vanneman, M., Hömig-Hölzel, C., Wang, Z.,  
403 Derudder, E., Li, S., Chakraborty, T., Cotter, S.E., Koyama, S., Currie, T., Freeman,  
404 G.J., Kutok, J.L., Rodig, S.J., Dranoff, G., Rajewsky, K., 2012. Immune surveillance

405 and therapy of lymphomas driven by Epstein-Barr virus protein LMP1 in a mouse  
406 model. Cell 148, 739–751. <https://doi.org/10.1016/j.cell.2011.12.031>  
407

## Figure 1

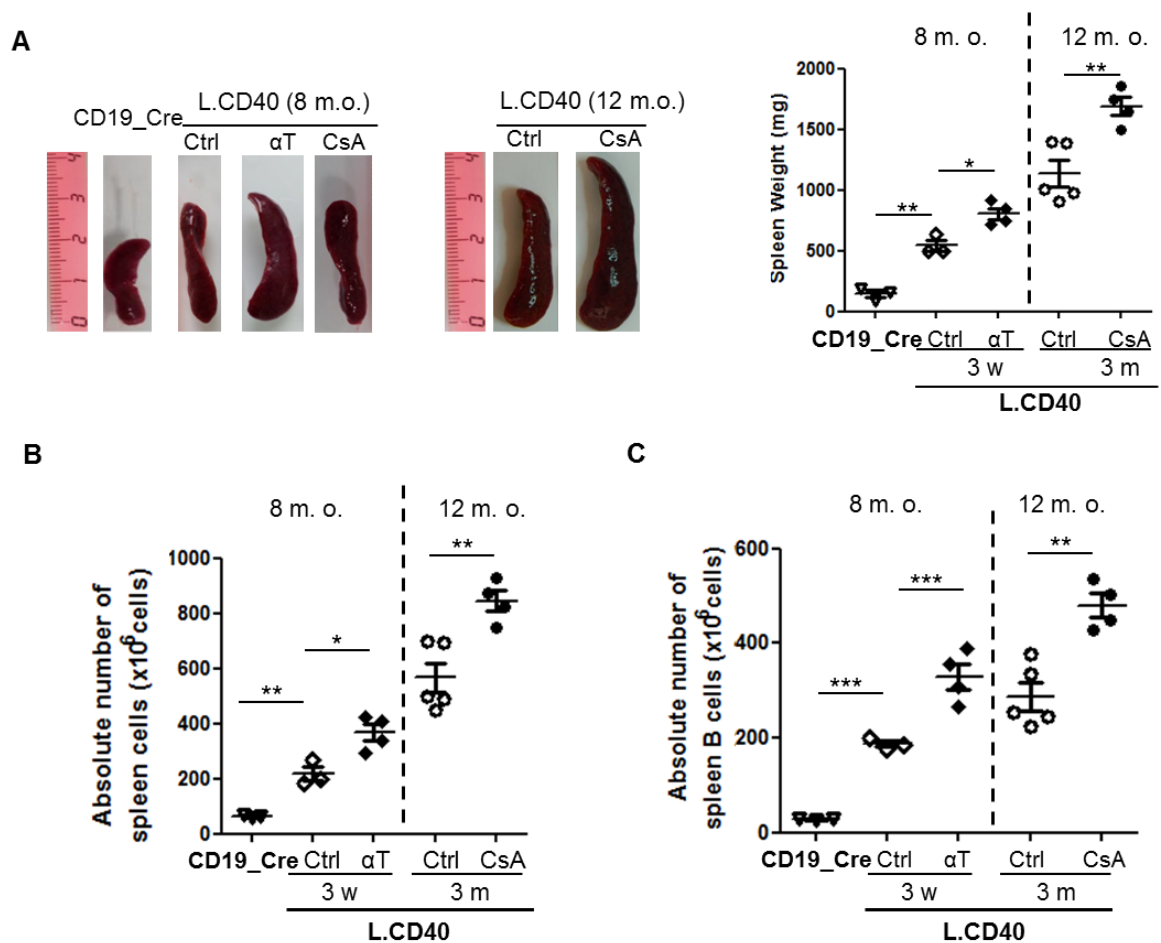

408

409 **Figure 1. Increased B-cell numbers in immunosuppressed L.CD40 mice.** L.CD40 mice  
410 were immunosuppressed through intra-peritoneal injection of anti-T cocktail (L.CD40  $\alpha$ T) or  
411 CsA (L.CD40 CsA). CD19\_Cre mice were used as control wild type mice. For each  
412 treatment, isotype antibody (for T cell depletion), or placebo (for CsA treatment) were used as  
413 controls (Ctrl). (A) Representative spleen size (left panel), and spleen weight (right panel) of  
414 L.CD40 mice immunosuppressed by  $\alpha$ T (3 weeks; w) or CsA (3 months; m). (B) Absolute  
415 numbers of spleen cells in L.CD40 mice after depletion of T cells for 3 weeks (w) or after  
416 CsA treatment for 3 months (m). (C) Flow cytometry of B220 spleen B-cell absolute numbers  
417 in immunosuppressed L.CD40 mice. Age of mice at the end of treatment is indicated above  
418 dot plots (m.o.; month old). Statistical significance was determined by Student's t-test (\*\*  
419  $p < 0.001$ ; \*\*  $p < 0.01$ ; \*  $p < 0.05$ ).

## Figure 2

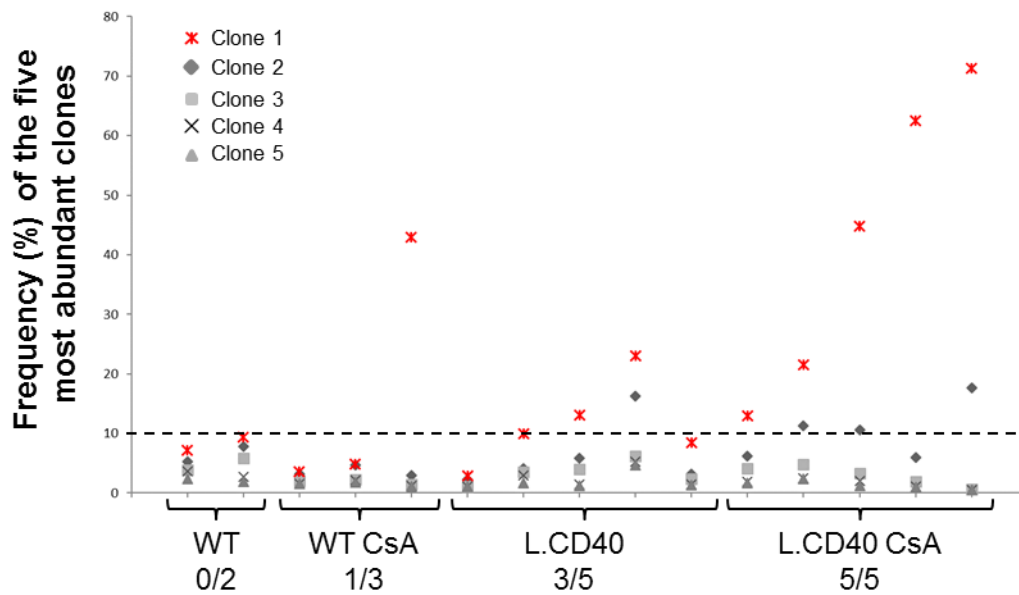

420

421 **Figure 2. Frequency of the five most abundant clones for wild type (WT) and L.CD40**

422 **mice treated or not with CsA. Legends of clones are ordered by decreasing frequency for**

423 **each mouse. The dominant clone is highlighted in red**

424

425

426

427

428

429

430

431

### Figure 3

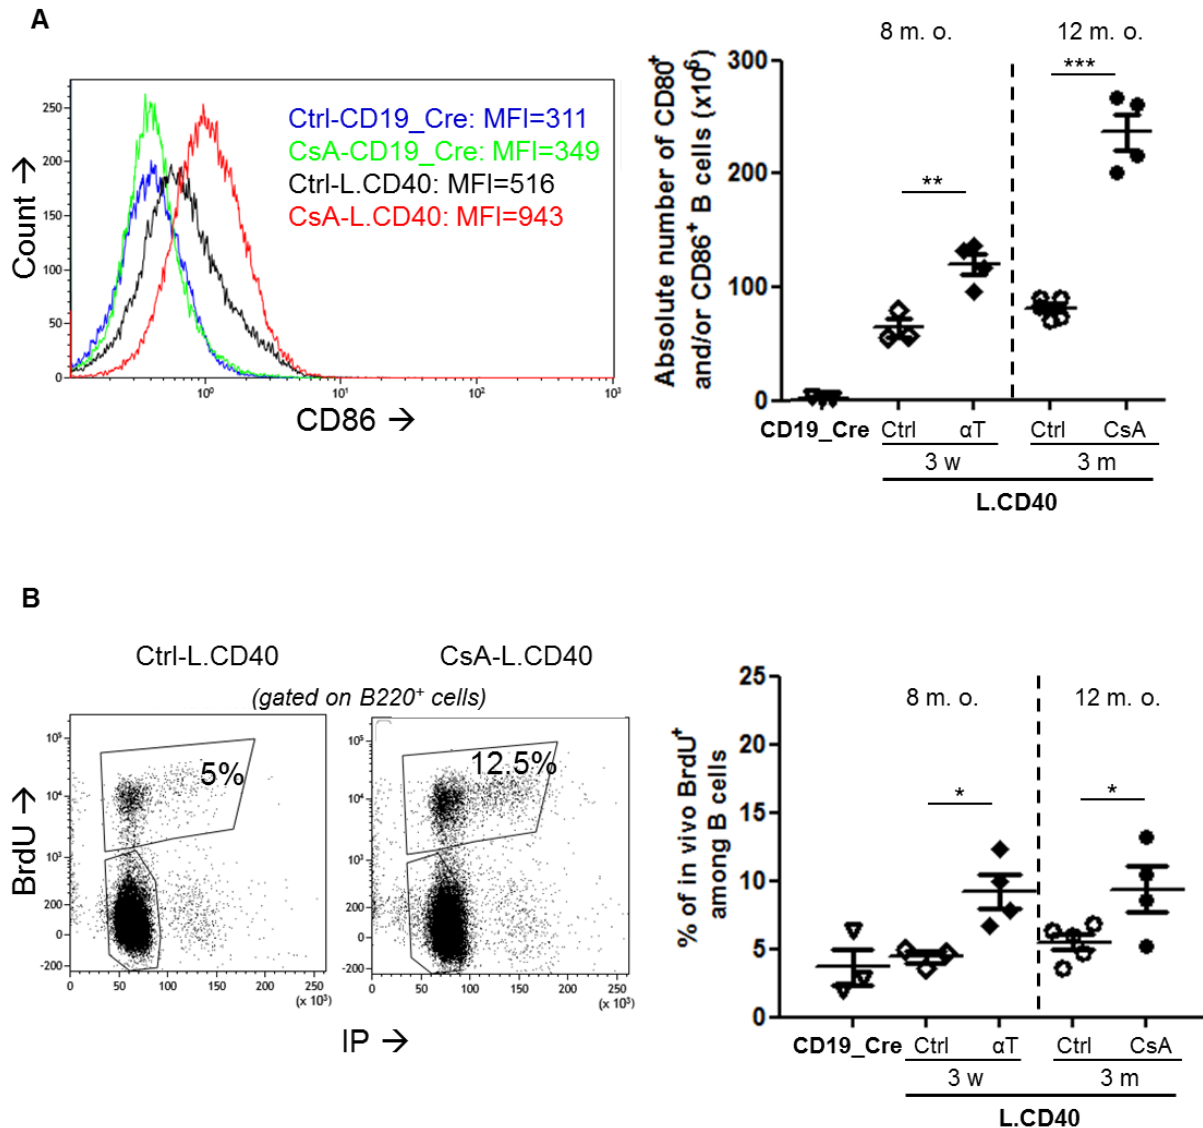

432

433 **Figure 3. Gain of proliferation and activation in spleen B-cells from L.CD40**

434 **immunosuppressed mice.** (A) Representative overlay graph for the cell surface expression of

435 marker CD86 on spleen B-lymphocytes (left panel); means and standards deviation of

436 absolute numbers of B220 spleen B-cells expressing activation markers CD80 and/or CD86

437 (right panel). (B) Flow cytometry graph of BrdU and DNA content by propidium iodide

438 staining for Ctrl or CsA L.CD40 (left panel); Means and standards deviation of flow

439 cytometry percentages of BrdU positive B-cells after *in vivo* BrdU incorporation (right panel).

440 Age of mice at the end of treatment is indicated above dot plots (m.o.; month old). Statistical

441 significance was determined by Student's t-test (\*\* $p < 0.001$ ; \*\*  $p < 0.01$ ; \*  $p < 0.05$ ).

## Figure 4

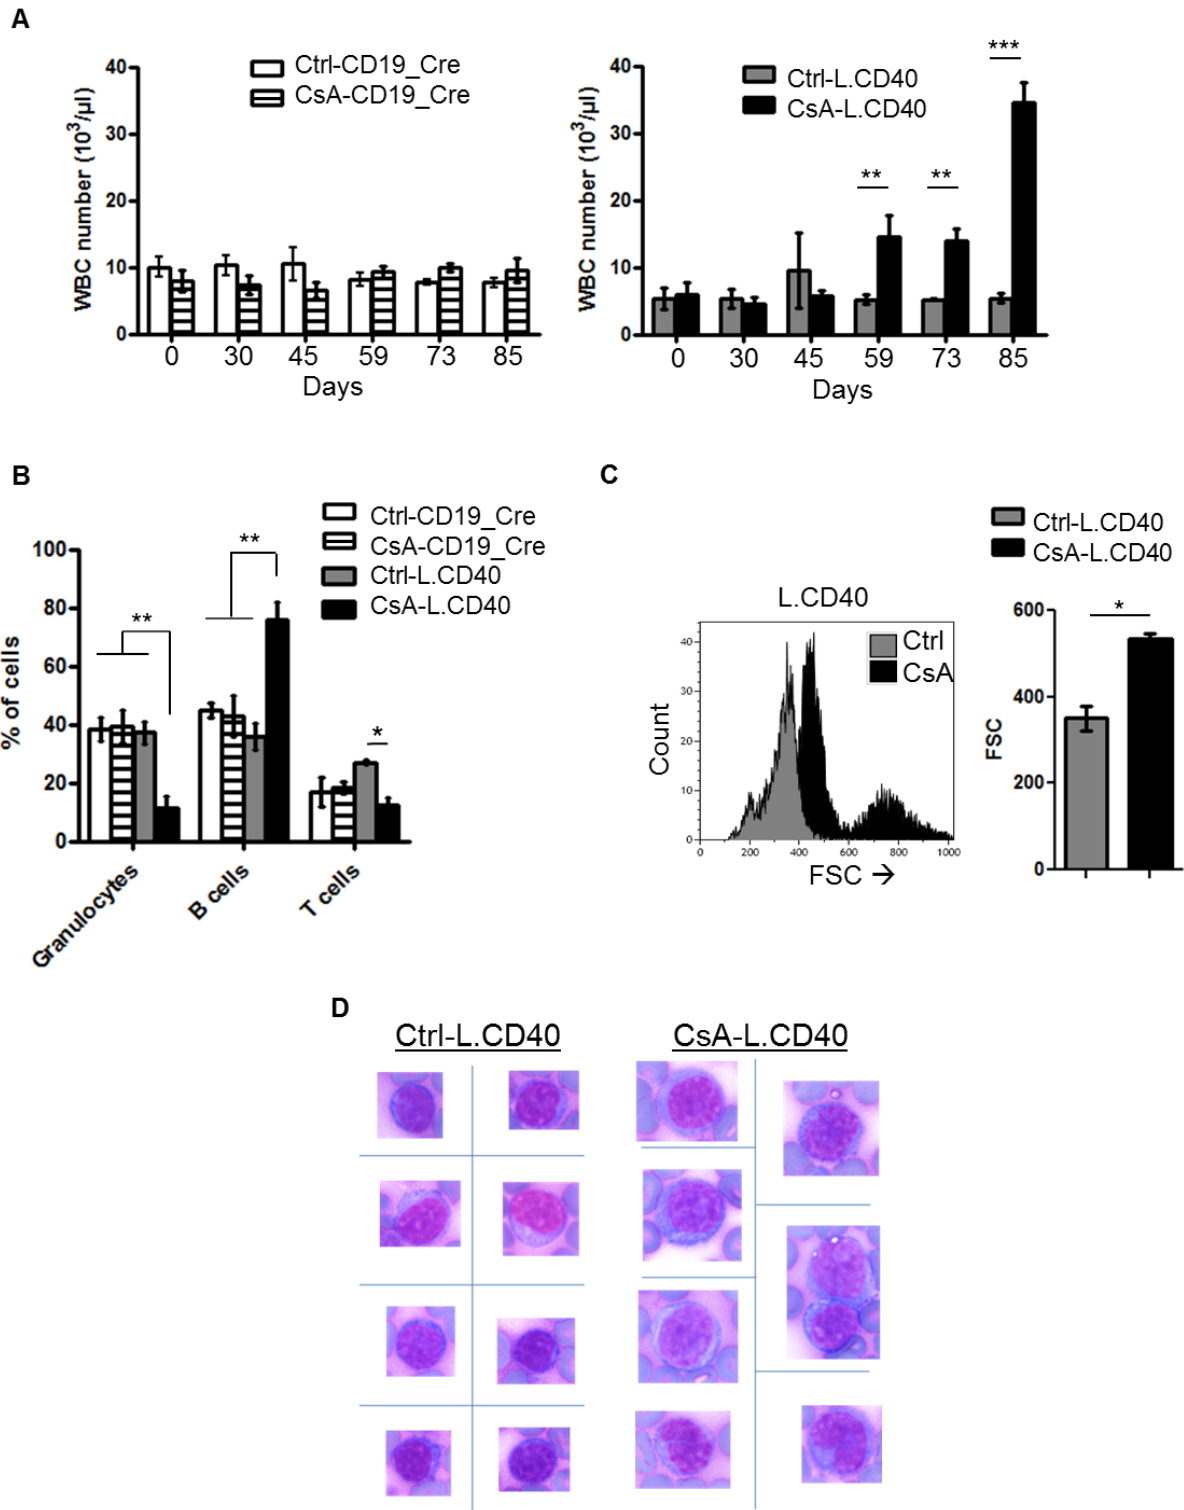

442

443 **Figure 4. B-cell expansion into blood in long term CsA immunosuppressed L.CD40**  
444 **mice.** (A) Number of circulating white blood cells in immunosuppressed (CsA) or untreated  
445 (Ctrl) CD19\_Cre and L.CD40 mice. (B) Flow cytometry percentages of circulating  
446 granulocytes (Gr-1 positive cells), B-cells (B220 positive cells) and T-cells (CD3 positive



447 cells). Each mouse type and treatment condition is indicated at the top right of the graph. (C)  
448 Flow cytometry estimation of circulating B-cell size from Ctrl and CsA-L.CD40 mice. Left  
449 panel, overlay of FSC monoparametric histograms gated on B220 B-cells. Right panel, means  
450 and standard deviations of FSC for all studied mice. (D) Representative lymphocyte  
451 morphology after May Grünwald Giemsa staining of blood smears from Ctrl and CsA-  
452 L.CD40 mice (magnification X 1000). For all experiments, at least 4 mice were studied for  
453 each condition. Statistical significance was determined by Student's t-test (\*\*\*  $p < 0.001$ ; \*\*  
454  $p < 0.01$ ; \*  $p < 0.05$ ).

455
